# Supplementary material
Source: MDPI journal article supplement (https://www.mdpi.com/2076-3417/12/18/9205)
Supplement: s1 [file s1 › applsci-1889550-supplementary.pdf]

# Supplementary Materials: Hybridization of DRASTIC Method to Assess Future GroundWater Vulnerability Scenarios: Case of the Tebessa-Morsott Alluvial Aquifer (Northeastern Algeria)

Abdelmadjid Boufekane, Moufida Belloula, Gianluigi Busico, Tarek Drias, Azzeddine Reghais and Djamel Maizi

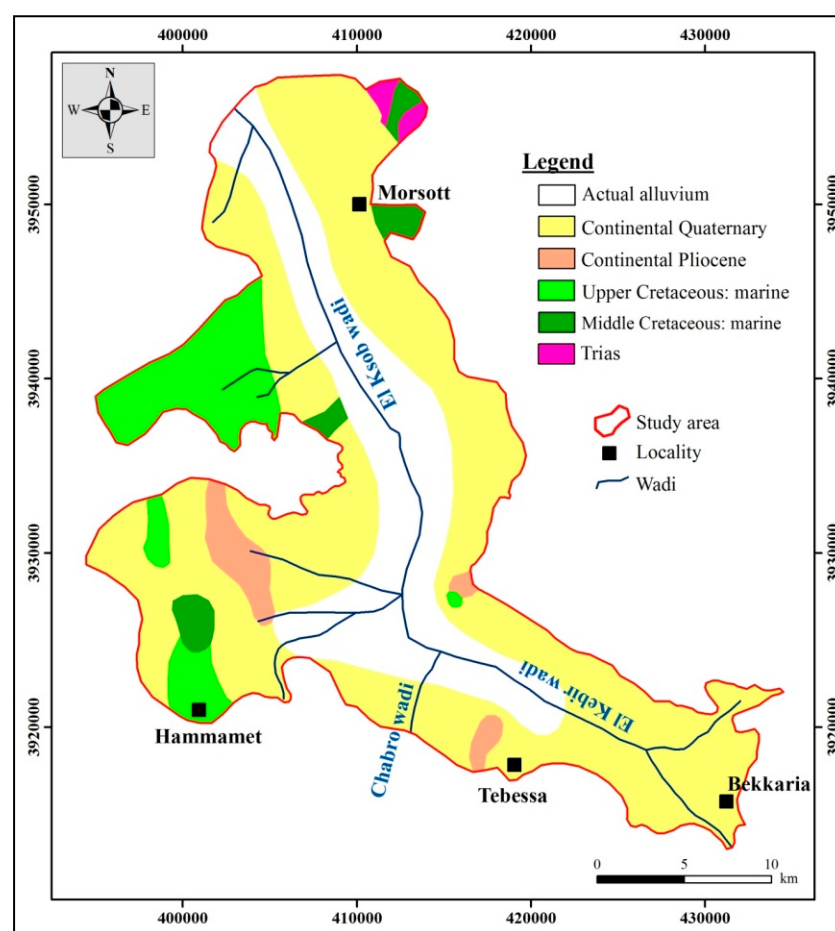

**Figure S1.** Geological map of the study area.

Geologic legend : Actual Alluvium: alluvial deposits; Continental Quaternary: old alluvial deposits composed of clay and pebble; Continental Pliocene: Red clay and conglomerate; Upper Cretaceous marine: Alternation of limestone and marl; Middle Cretaceous marine: limestone; Trias: clay and gypsum.

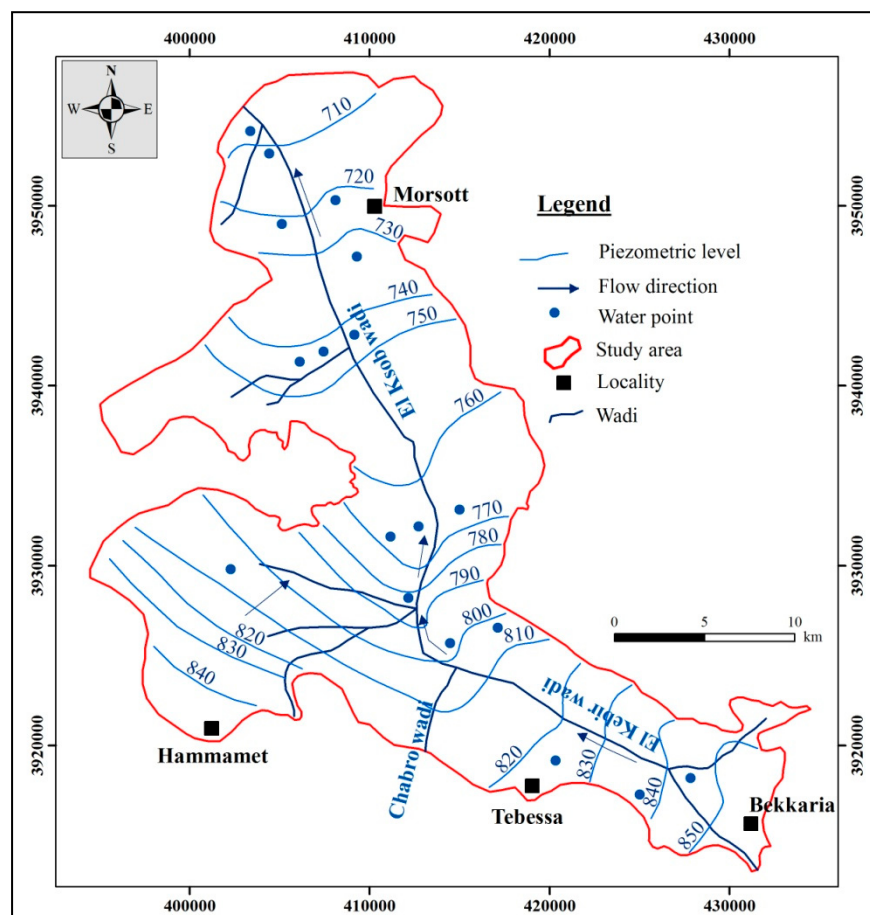

**Figure S2.** Piezometric map in the Tebessa-Morsott plain (May 2010).

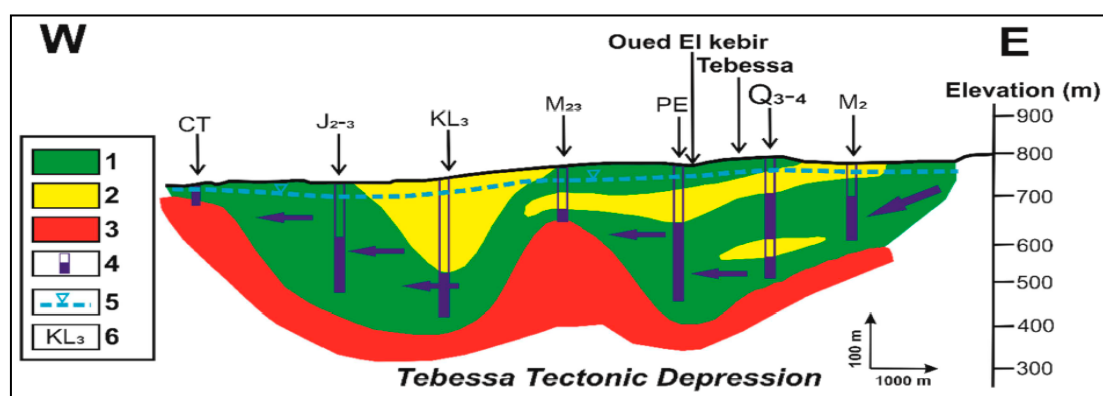

**Figure S3.** Hydrogeological cross-section in the Tebessa-Morsott plain.

- 1- Permeable zone (alluvial fans, silts, calcareous crust, conglomerates and gravels); 2- Impermeable zone (clay and marl); 3- Marly bedrock; 4- Screened interval; 5- Piezometric head, 6- Well name.

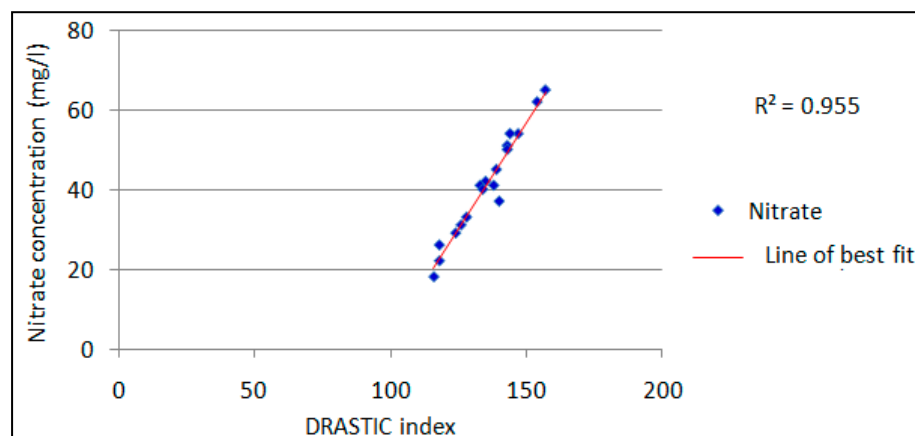

**Figure S4.** Comparison of the DRASTIC model with the nitrate values.

**Table S1.** Original DRASTIC weights and rating systems.

| Depth to water (m) |        | Recharge (mm/year) |        | Aquifer media            |        | Soil media        |        | Topography (%)    |        | Impact for vadose zone |        | Conductivity (m/day) |        |
|--------------------|--------|--------------------|--------|--------------------------|--------|-------------------|--------|-------------------|--------|------------------------|--------|----------------------|--------|
| Range              | Rating | Range              | Rating | Range                    | Rating | Range             | Rating | Range             | Rating | Range                  | Rating | Range                | Rating |
| (0–1.5)            | 10     | (0–50)             | 1      | Massive Shale            | 2      | Thin/Absent       | 10     | (0–2)             | 10     | Confining Layer        | 1      | (0.04–4.1)           | 1      |
| (1.5–4.6)          | 9      | (50–100)           | 3      | Metamor/Igneous          | 3      | Gravel            | 10     | (2–6)             | 9      | Silt/Clay              | 3      | (4.1–12.3)           | 2      |
| (4.6–9.1)          | 7      | (100–180)          | 6      | WeatheredMetamor/Igneous | 4      | Sand              | 9      | (6–12)            | 5      | Shale                  | 3      | (12.3–28.7)          | 4      |
| (9.1–15.2)         | 5      | (180–250)          | 8      | Glacial Till             | 5      | Peat              | 8      | (12–18)           | 3      | Limestone              | 3      | (28.7–41)            | 6      |
| (15.2–22.8)        | 3      | (>250)             | 9      | Bedded Sand/Limes        | 6      | Shrinkig Clay     | 7      | (>18)             | 1      | Sandstone              | 6      | (41–82)              | 8      |
| (22.8–30.4)        | 2      |                    |        | Massive sandstone        | 6      | Sandy Loam        | 6      |                   |        | Bedded Limes/Sand      | 6      | (>82)                | 10     |
| (>30.4)            | 1      |                    |        | Massive limestone        | 8      | Loam              | 5      |                   |        | Sand/Gravel/Silt       | 6      |                      |        |
|                    |        |                    |        | Sand and Gravel          | 8      | Silty Loam        | 4      |                   |        | Sand and Gravel        | 8      |                      |        |
|                    |        |                    |        | Basalt                   | 9      | Clay Loam         | 3      |                   |        | Basalt                 | 9      |                      |        |
|                    |        |                    |        | Karsts Limestone         | 10     | Muck              | 2      |                   |        | Karsts Limestone       | 10     |                      |        |
|                    |        |                    |        |                          |        | No shrinking Clay | 1      |                   |        |                        |        |                      |        |
| DRASTIC Weight: 5  |        | DRASTIC Weight: 4  |        | DRASTIC Weight: 3        |        | DRASTIC Weight: 2 |        | DRASTIC Weight: 1 |        | DRASTIC Weight: 5      |        | DRASTIC Weight: 3    |        |
